# Supplementary material for: Enzymatic Synthesis of a Novel Pterostilbene α-Glucoside by the Combination of Cyclodextrin Glucanotransferase and Amyloglucosidase
Source: PubMed Central journal article supplement (PMC6100302; doi:10.3390/molecules23061271), 2018-05-25
Supplement: molecules-23-01271-s001.pdf [file molecules-23-01271-s001.pdf]

# Enzymatic synthesis of a novel pterostilbene $\alpha$ -glucoside by the combination of cyclodextrin glucanotransferase and amyloglucosidase

Jose L. Gonzalez-Alfonso<sup>1</sup>, David Rodrigo-Frutos<sup>2</sup>, Efres Belmonte-Reche<sup>3</sup>, Pablo Peñalver<sup>3</sup>, Ana Poveda<sup>4</sup>, Jesús Jimenez-Barbero<sup>4</sup>, Antonio O. Ballesteros<sup>1</sup>, Yoshihiko Hirose<sup>5</sup>, Julio Polaina<sup>6</sup>, Juan C. Morales<sup>3</sup>, María Fernández-Lobato<sup>2</sup> and Francisco J. Plou<sup>1,\*</sup>

- <sup>1</sup> Instituto de Catálisis y Petroleoquímica, CSIC, 28049 Madrid, Spain; [josel.g@csic.es](mailto:josel.g@csic.es) (J.L.G.-A.); [a.ballesteros@icp.csic.es](mailto:a.ballesteros@icp.csic.es) (A.O.B.)
  - <sup>2</sup> Centro de Biología Molecular Severo Ochoa (CSIC-UAM), Departamento Biología Molecular, UAM, 28049 Madrid, Spain.; [mfernandez@cbm.csic.es](mailto:mfernandez@cbm.csic.es) (M.F.-L.), [drodrigo@cbm.csic.es](mailto:drodrigo@cbm.csic.es) (D.R.-F.)
  - <sup>3</sup> Instituto de Parasitología y Biomedicina "Lopez-Neyra", CSIC, PTS Granada, 18016 Armilla,, Granada, Spain; [efresbr@ipb.csic.es](mailto:efresbr@ipb.csic.es) (E.B.-R.); [pablo@ipb.csic.es](mailto:pablo@ipb.csic.es) (P.P.); [jcmorales@ipb.csic.es](mailto:jcmorales@ipb.csic.es) (J.C.M.)
  - <sup>4</sup> Center for Cooperative Research in Biosciences, Parque Científico Tecnológico de Bizkaia, 48160 Derio, Biscay, Spain; [apoveda@cicbiogune.es](mailto:apoveda@cicbiogune.es) (A.P.); [jjbarbero@cicbiogune.es](mailto:jjbarbero@cicbiogune.es) (J.J.-B)
  - <sup>5</sup> Enzyme Techno, Naganatsu, Ogaki, Gifu 503-0997, Japan; [yohirose@octn.jp](mailto:yohirose@octn.jp)
  - <sup>6</sup> Instituto de Agroquímica y Tecnología de Alimentos, CSIC, Valencia, Spain; [jpolaina@iata.csic.es](mailto:jpolaina@iata.csic.es)
- \* Correspondence: [fplou@icp.csic.es](mailto:fplou@icp.csic.es); Tel.: +34-91-585-4869

**Figure S1:** ESI-MS spectrum (positive mode) of the isolated pterostilbene monoglucoside.

**Figure S2:** ESI-MS spectrum (negative mode) of the isolated pterostilbene diglucoside.

**Figure S3:** NMR Spectra (600 MHz, DMSO-d<sub>6</sub>, 298 K) for pterostilbene 4'-O- $\alpha$ -D-glucopyranoside: (a) <sup>1</sup>H spectrum; (b) COSY; (c) HSQC- edited; (d) NOESY 500 ms.

**Figure S4:** HRMS and elementary composition calculation for pterostilbene 4'-O- $\alpha$ -D-glucopyranoside.

**Figure S1.**

ESI-MS spectrum (positive mode) of the isolated pterostilbene monoglucoside.

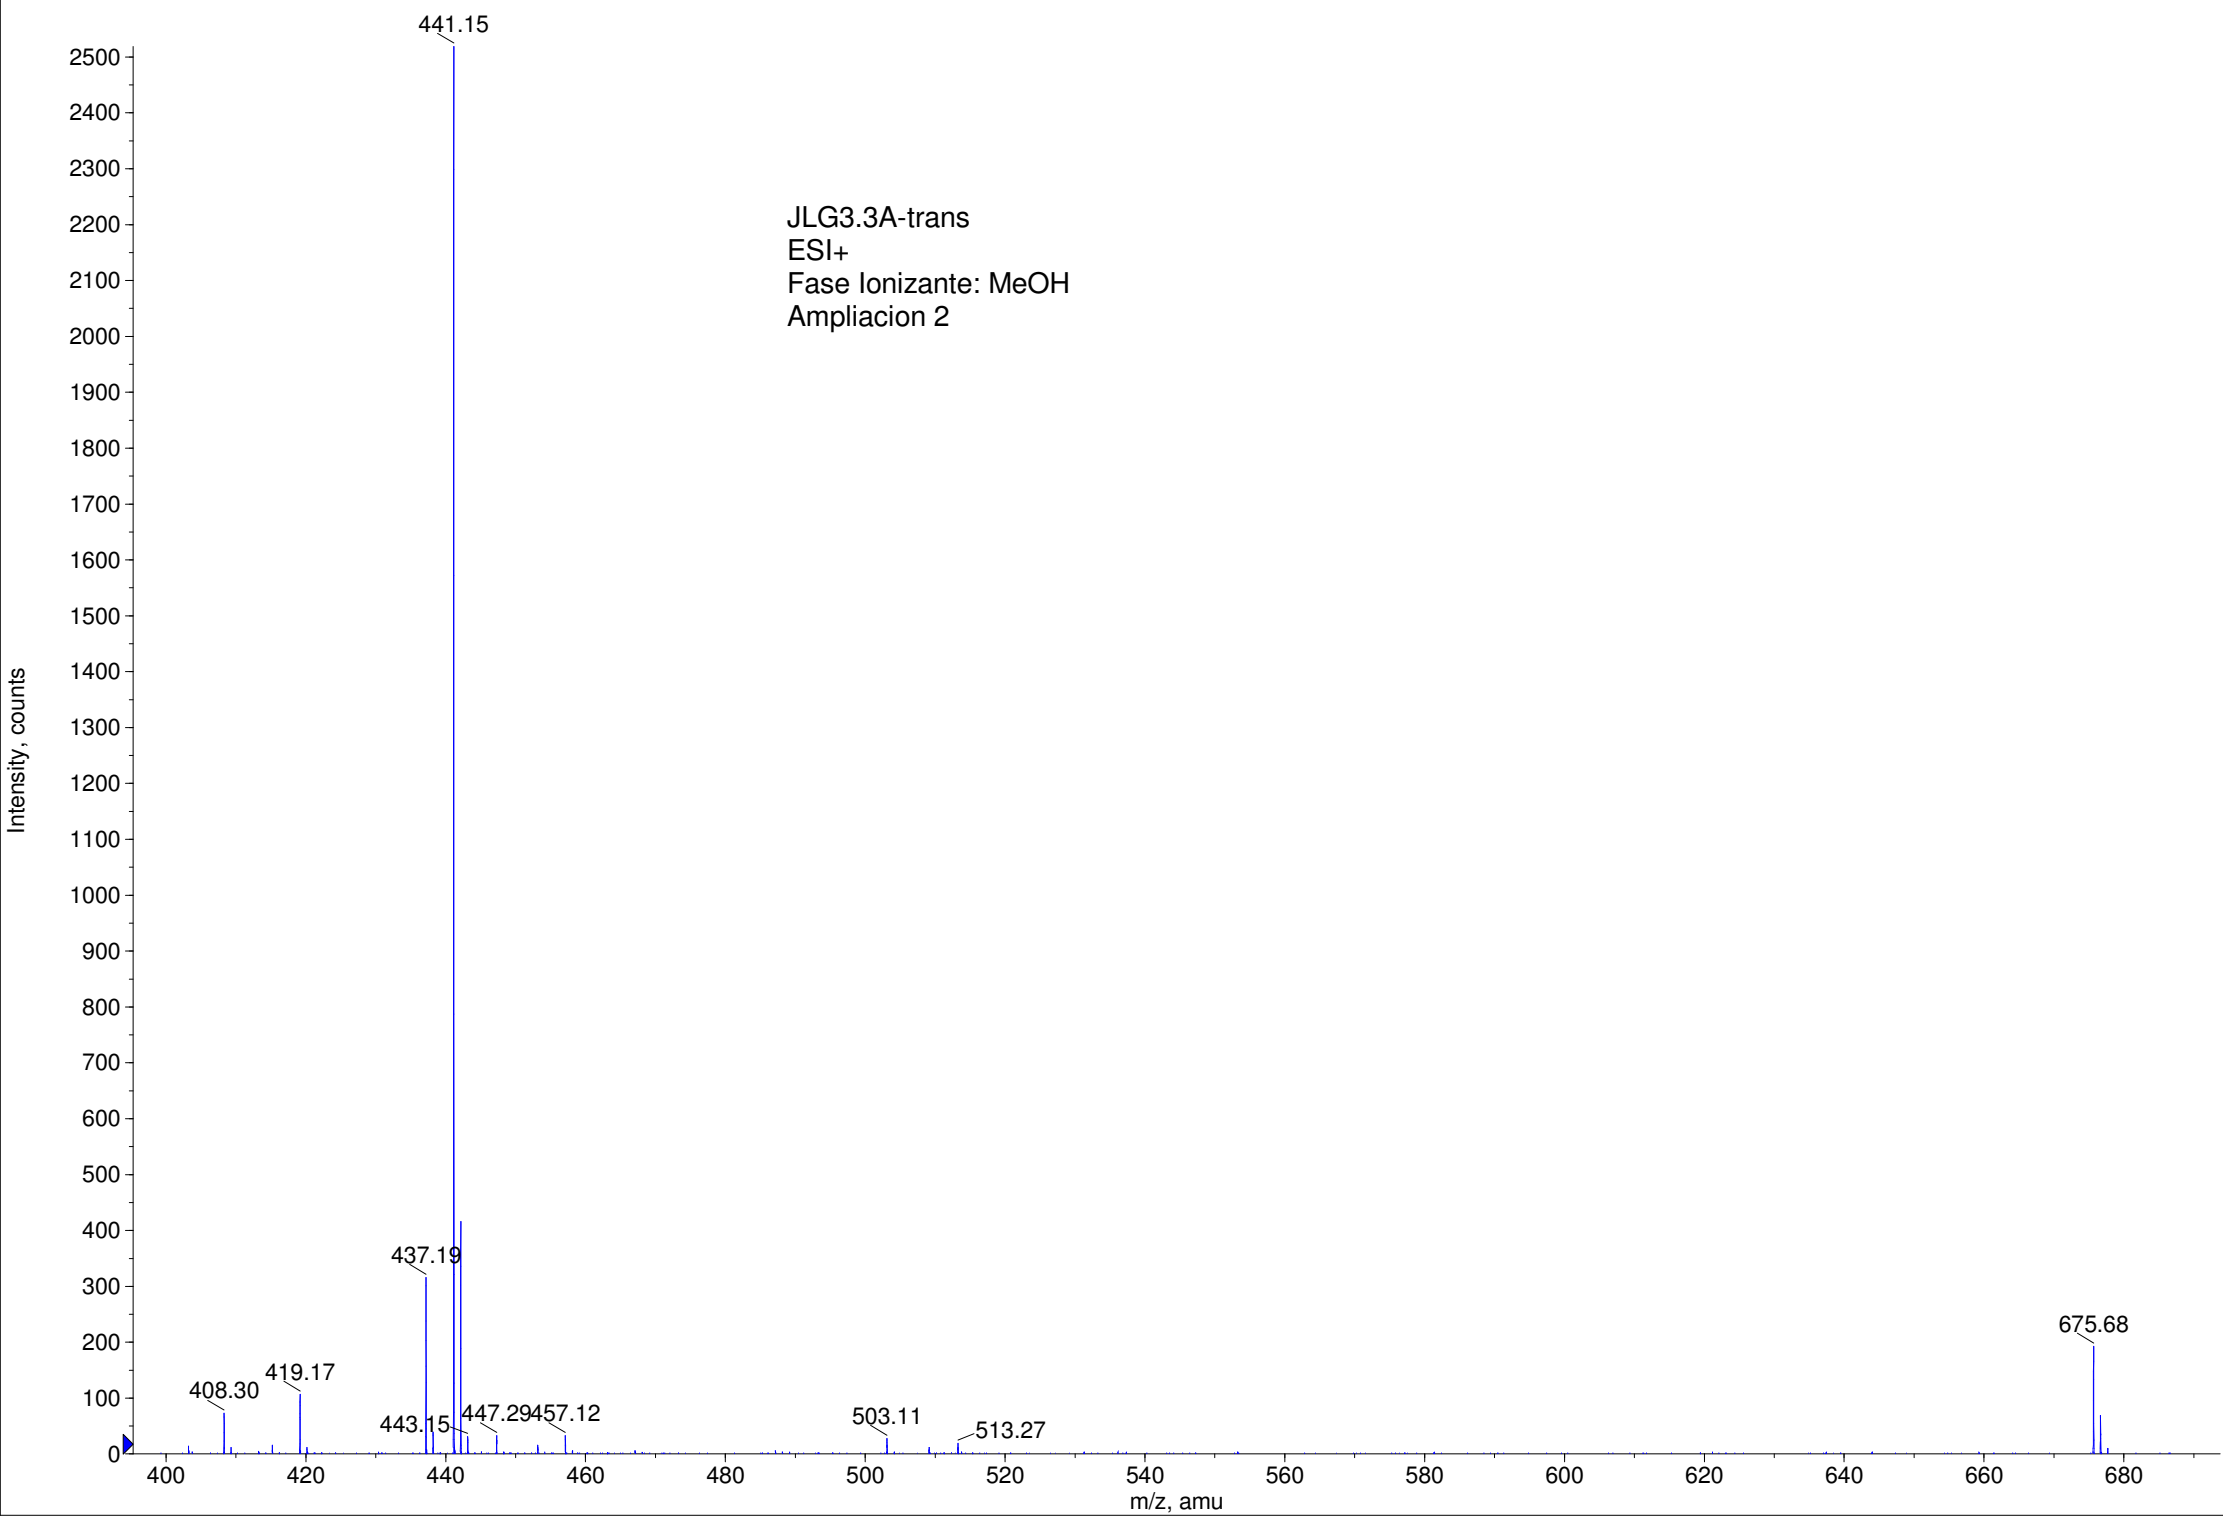

**Figure S2.**

ESI-MS spectrum (negative mode) of the isolated pterostilbene diglucoside.

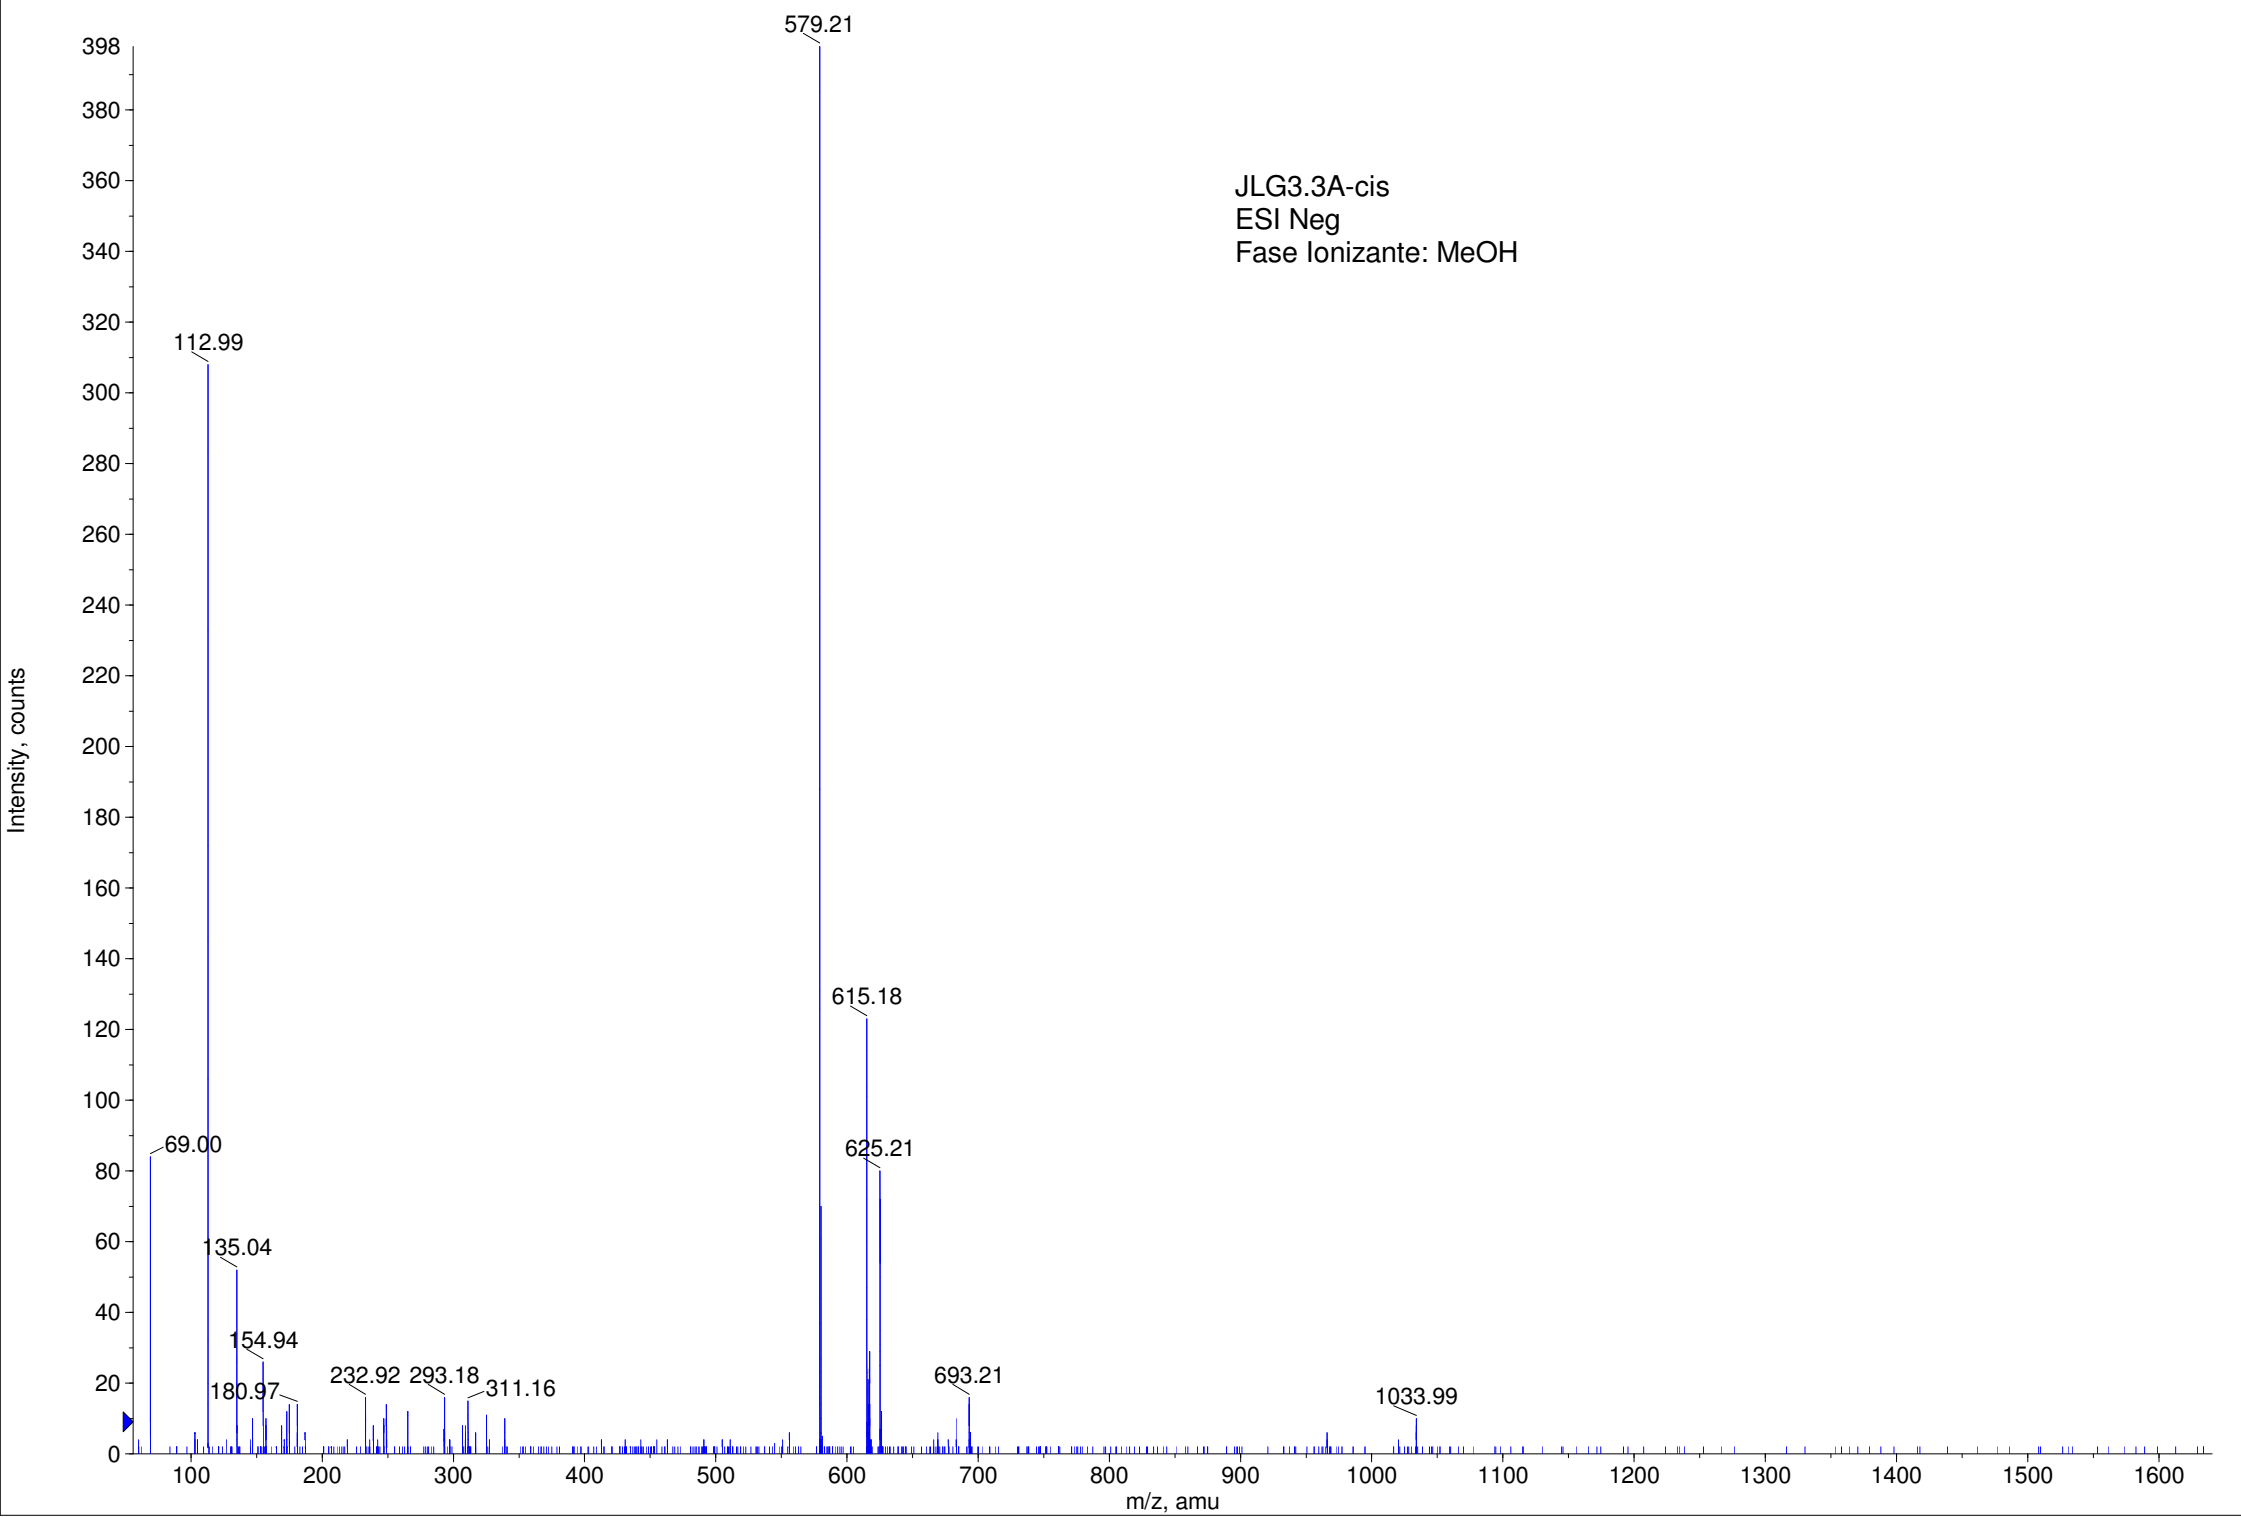

**Figure S3.**

NMR Spectra (600 MHz, DMSO-d<sub>6</sub>, 298 K) for pteroestilbene 4'-O- $\alpha$ -D-glucopyranoside: (a) <sup>1</sup>H spectrum; (b) COSY; (c) HSQC- edited; (d) NOESY 500 ms.

NMR Spectra (600 MHz, DMSO-*d*<sub>6</sub>, 298K) for pteroestilbene 4'-O- $\alpha$ -D-glucopyranoside

(a) <sup>1</sup>H spectrum

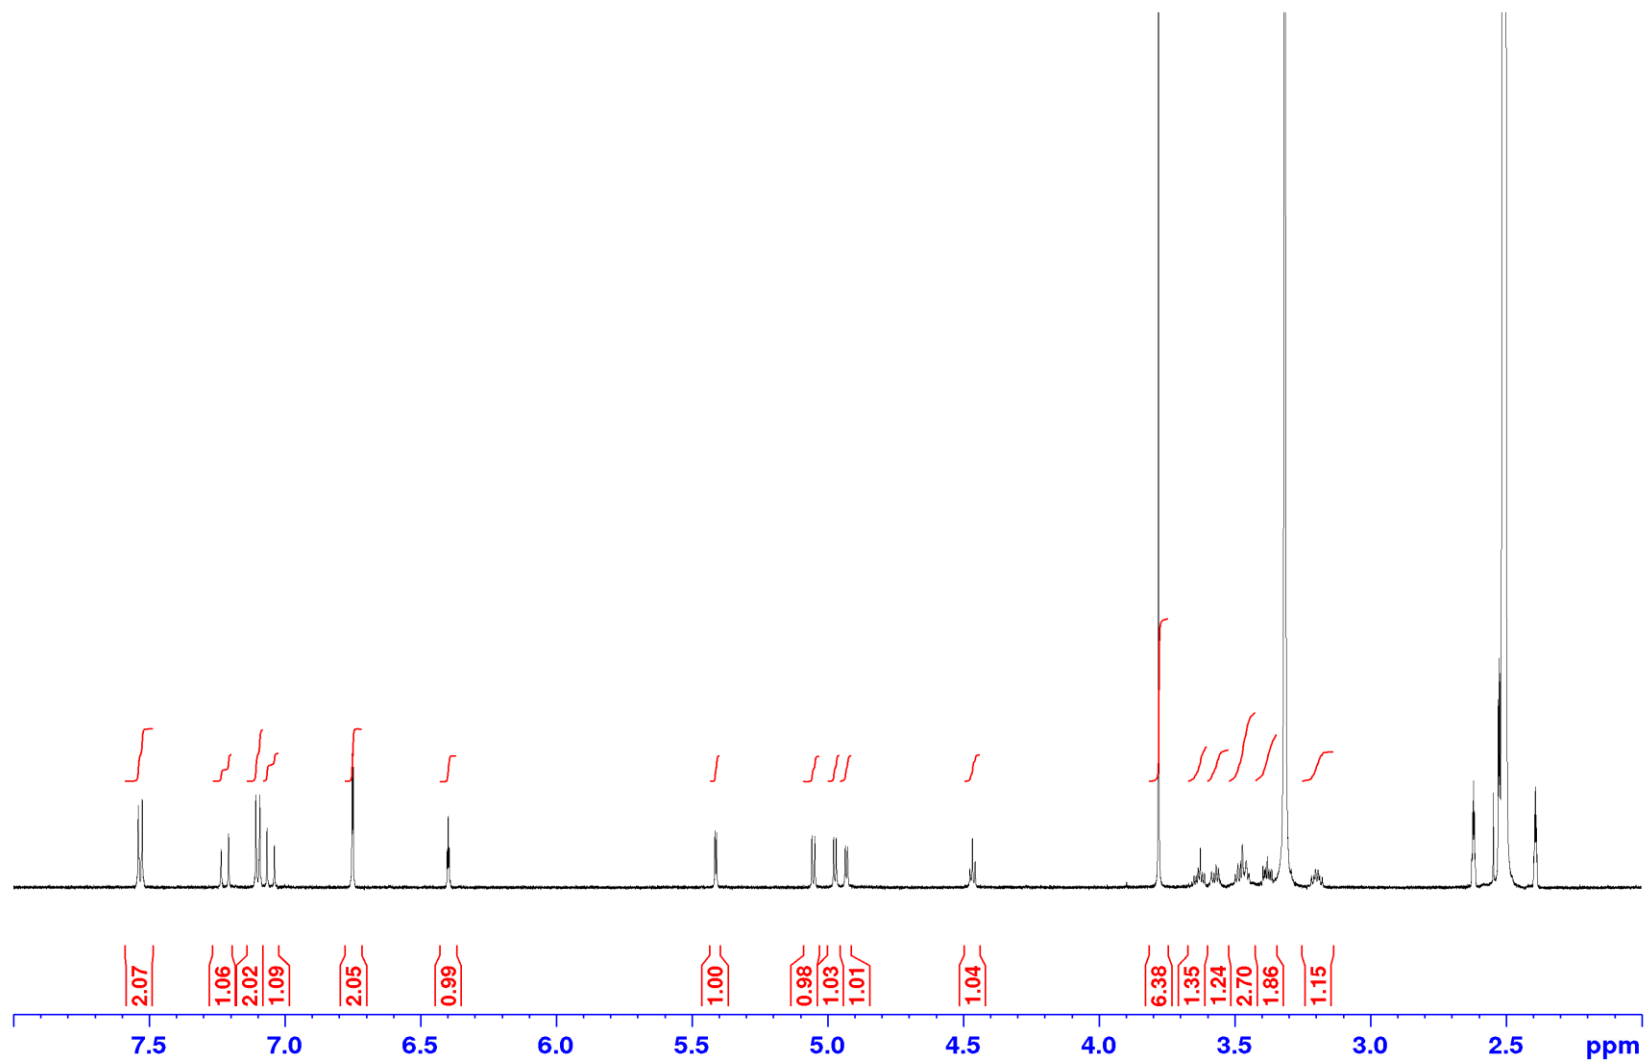

(b) COSY

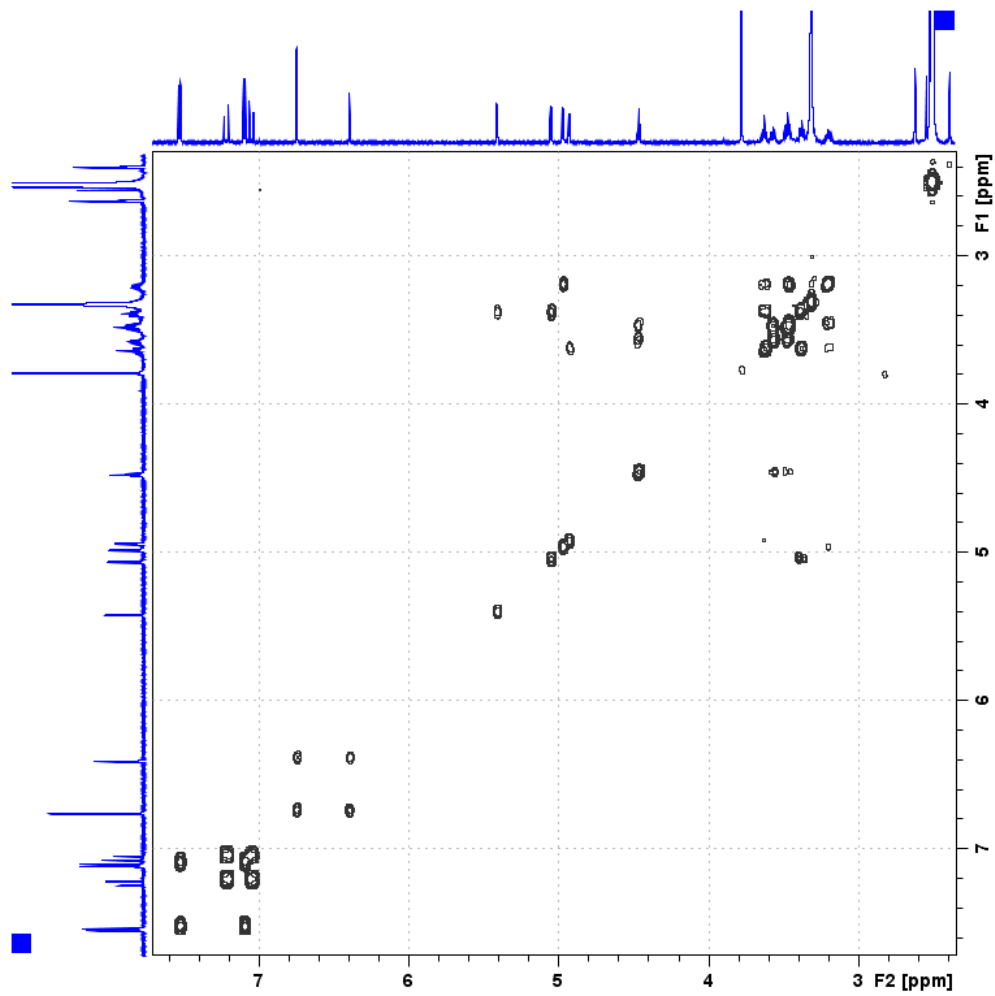



(c) HSQC- edited

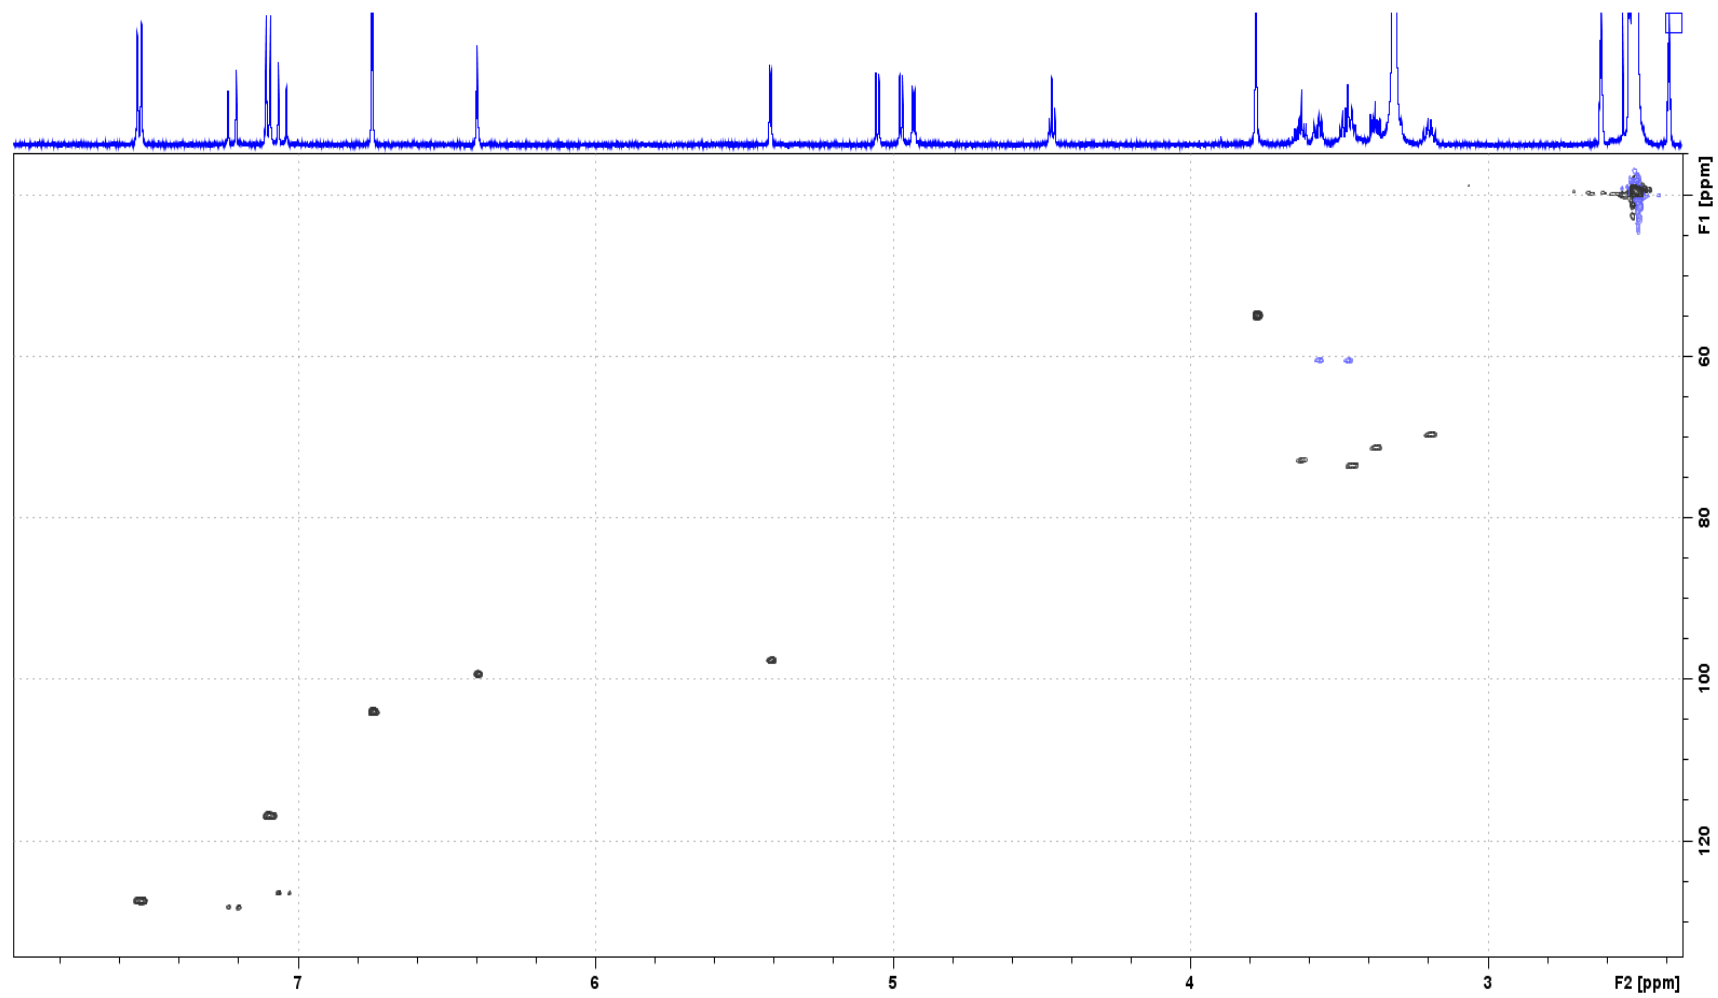

(d) NOESY 500ms

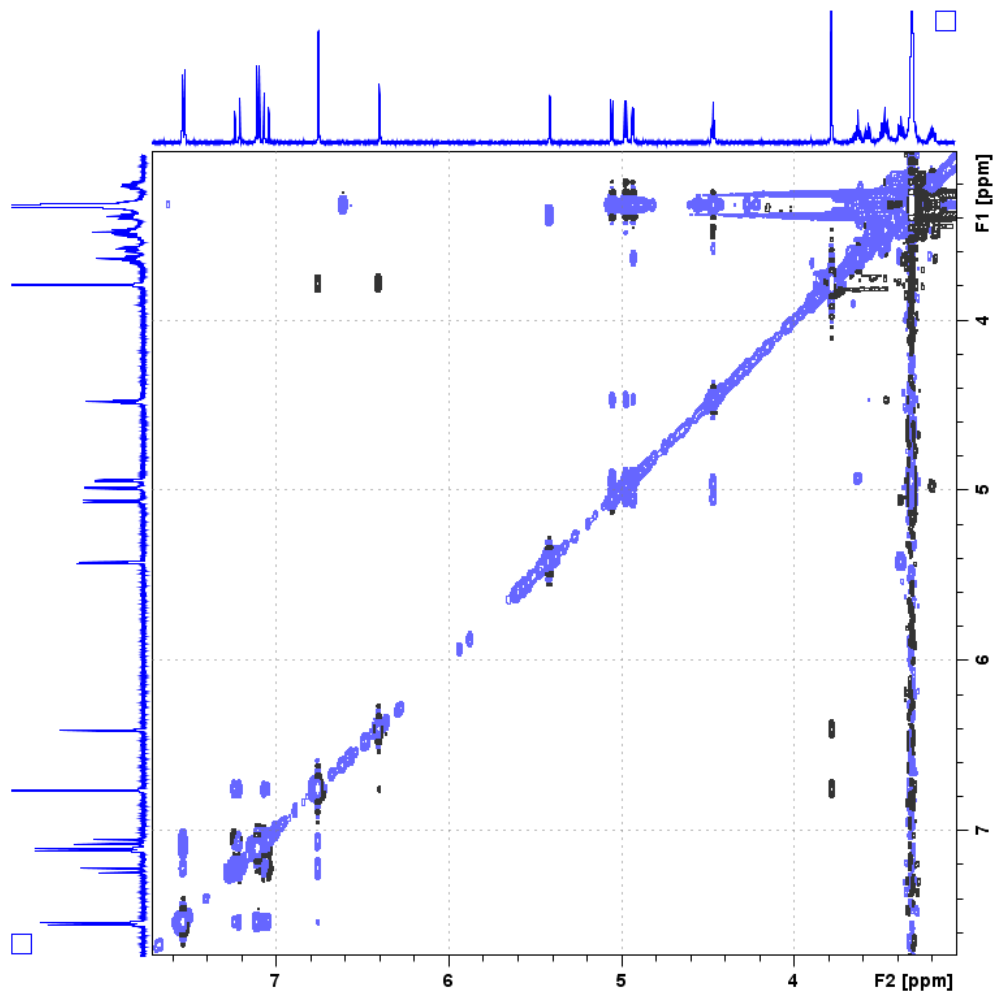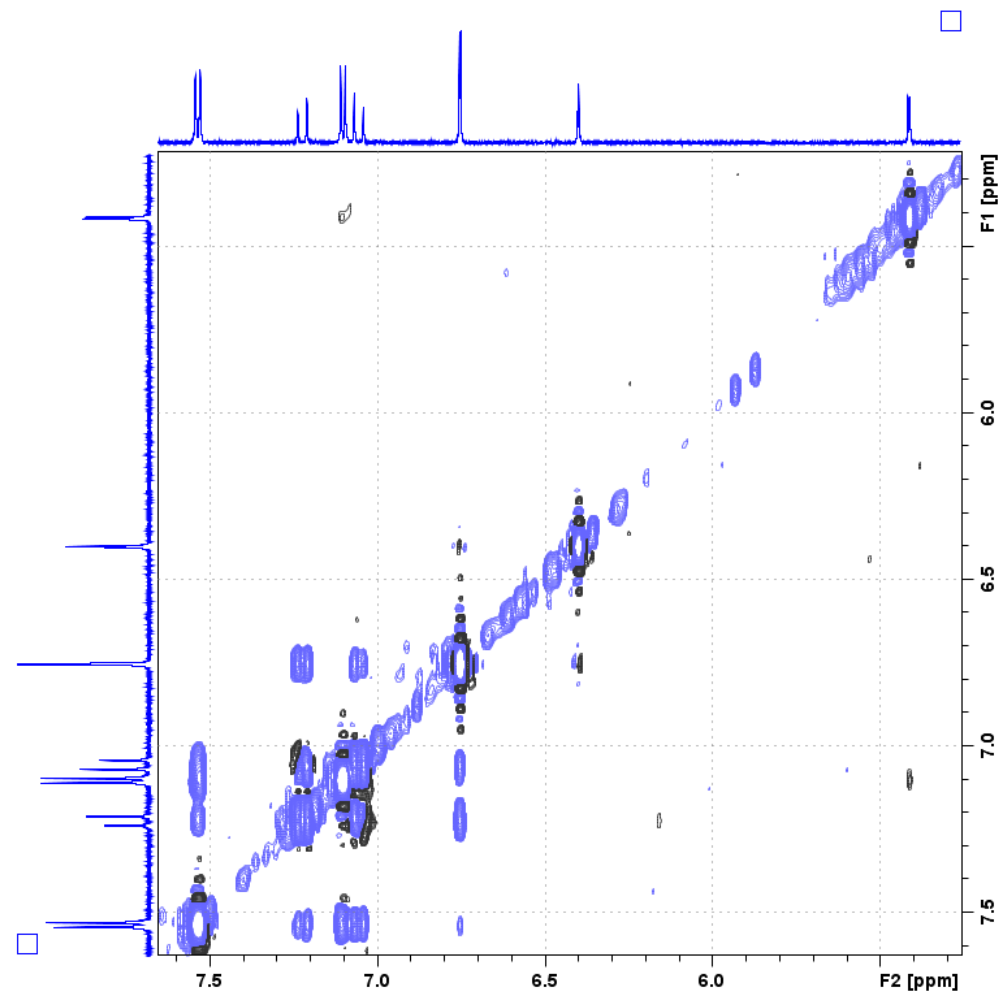

**Figure S4.**

HRMS and elementary composition calculation for pterostilbene 4'-O- $\alpha$ -D-glucopyranoside.

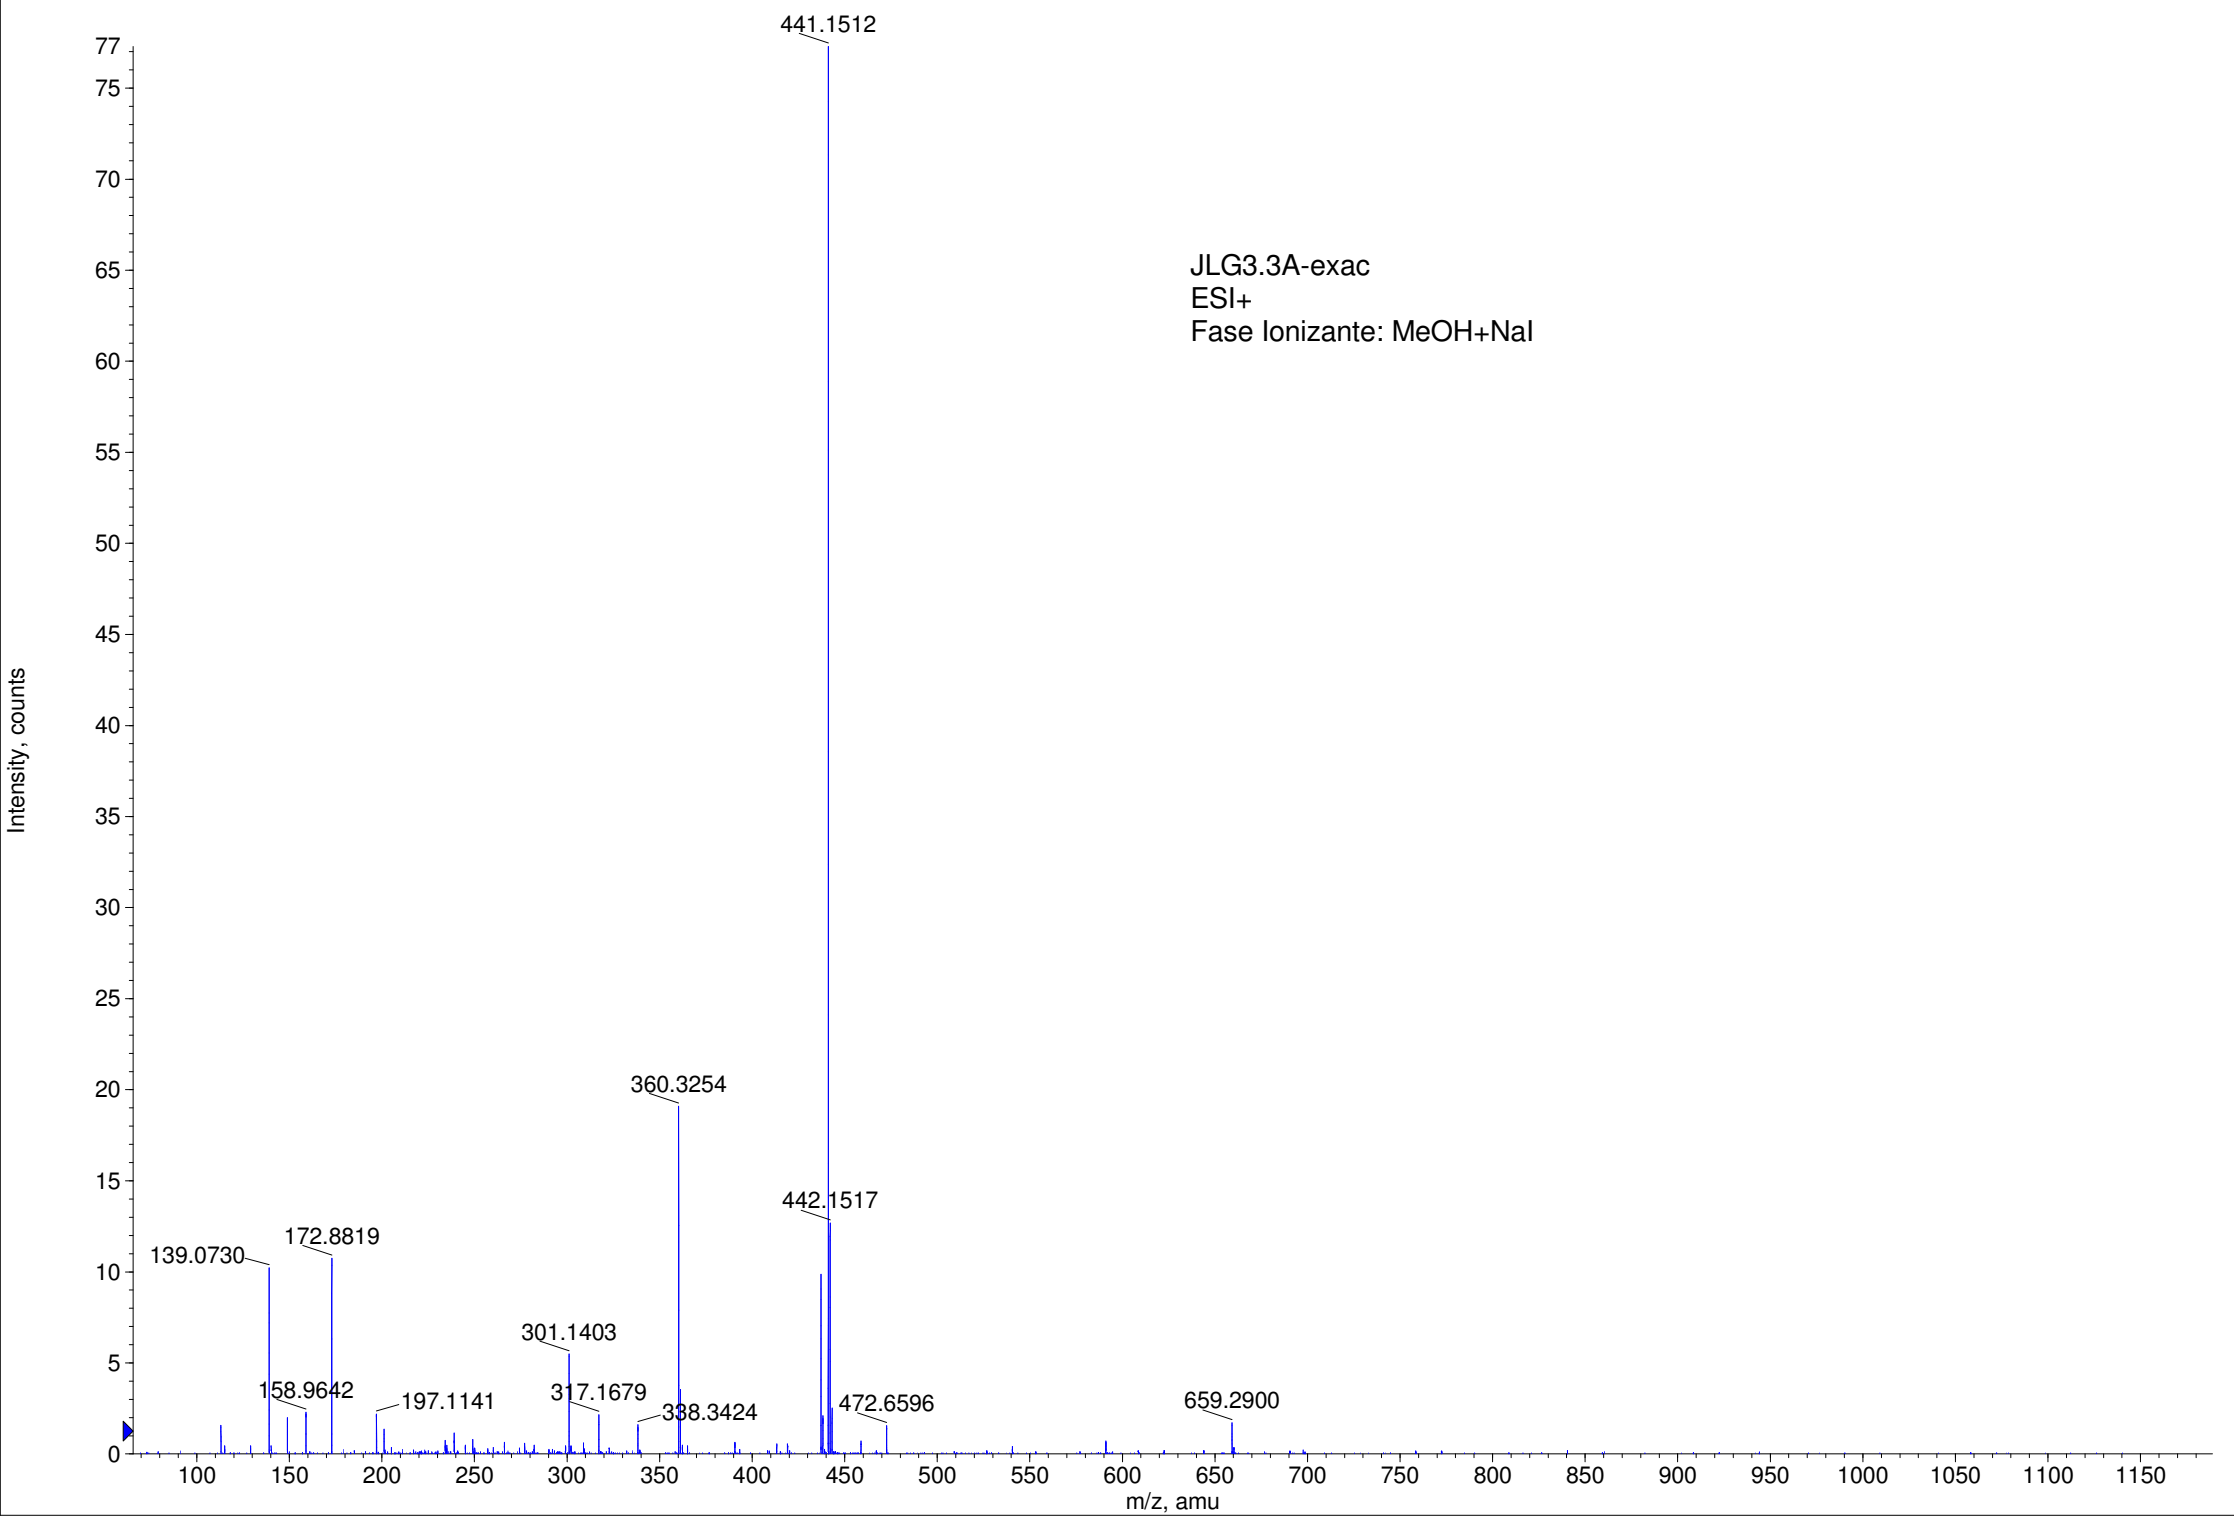

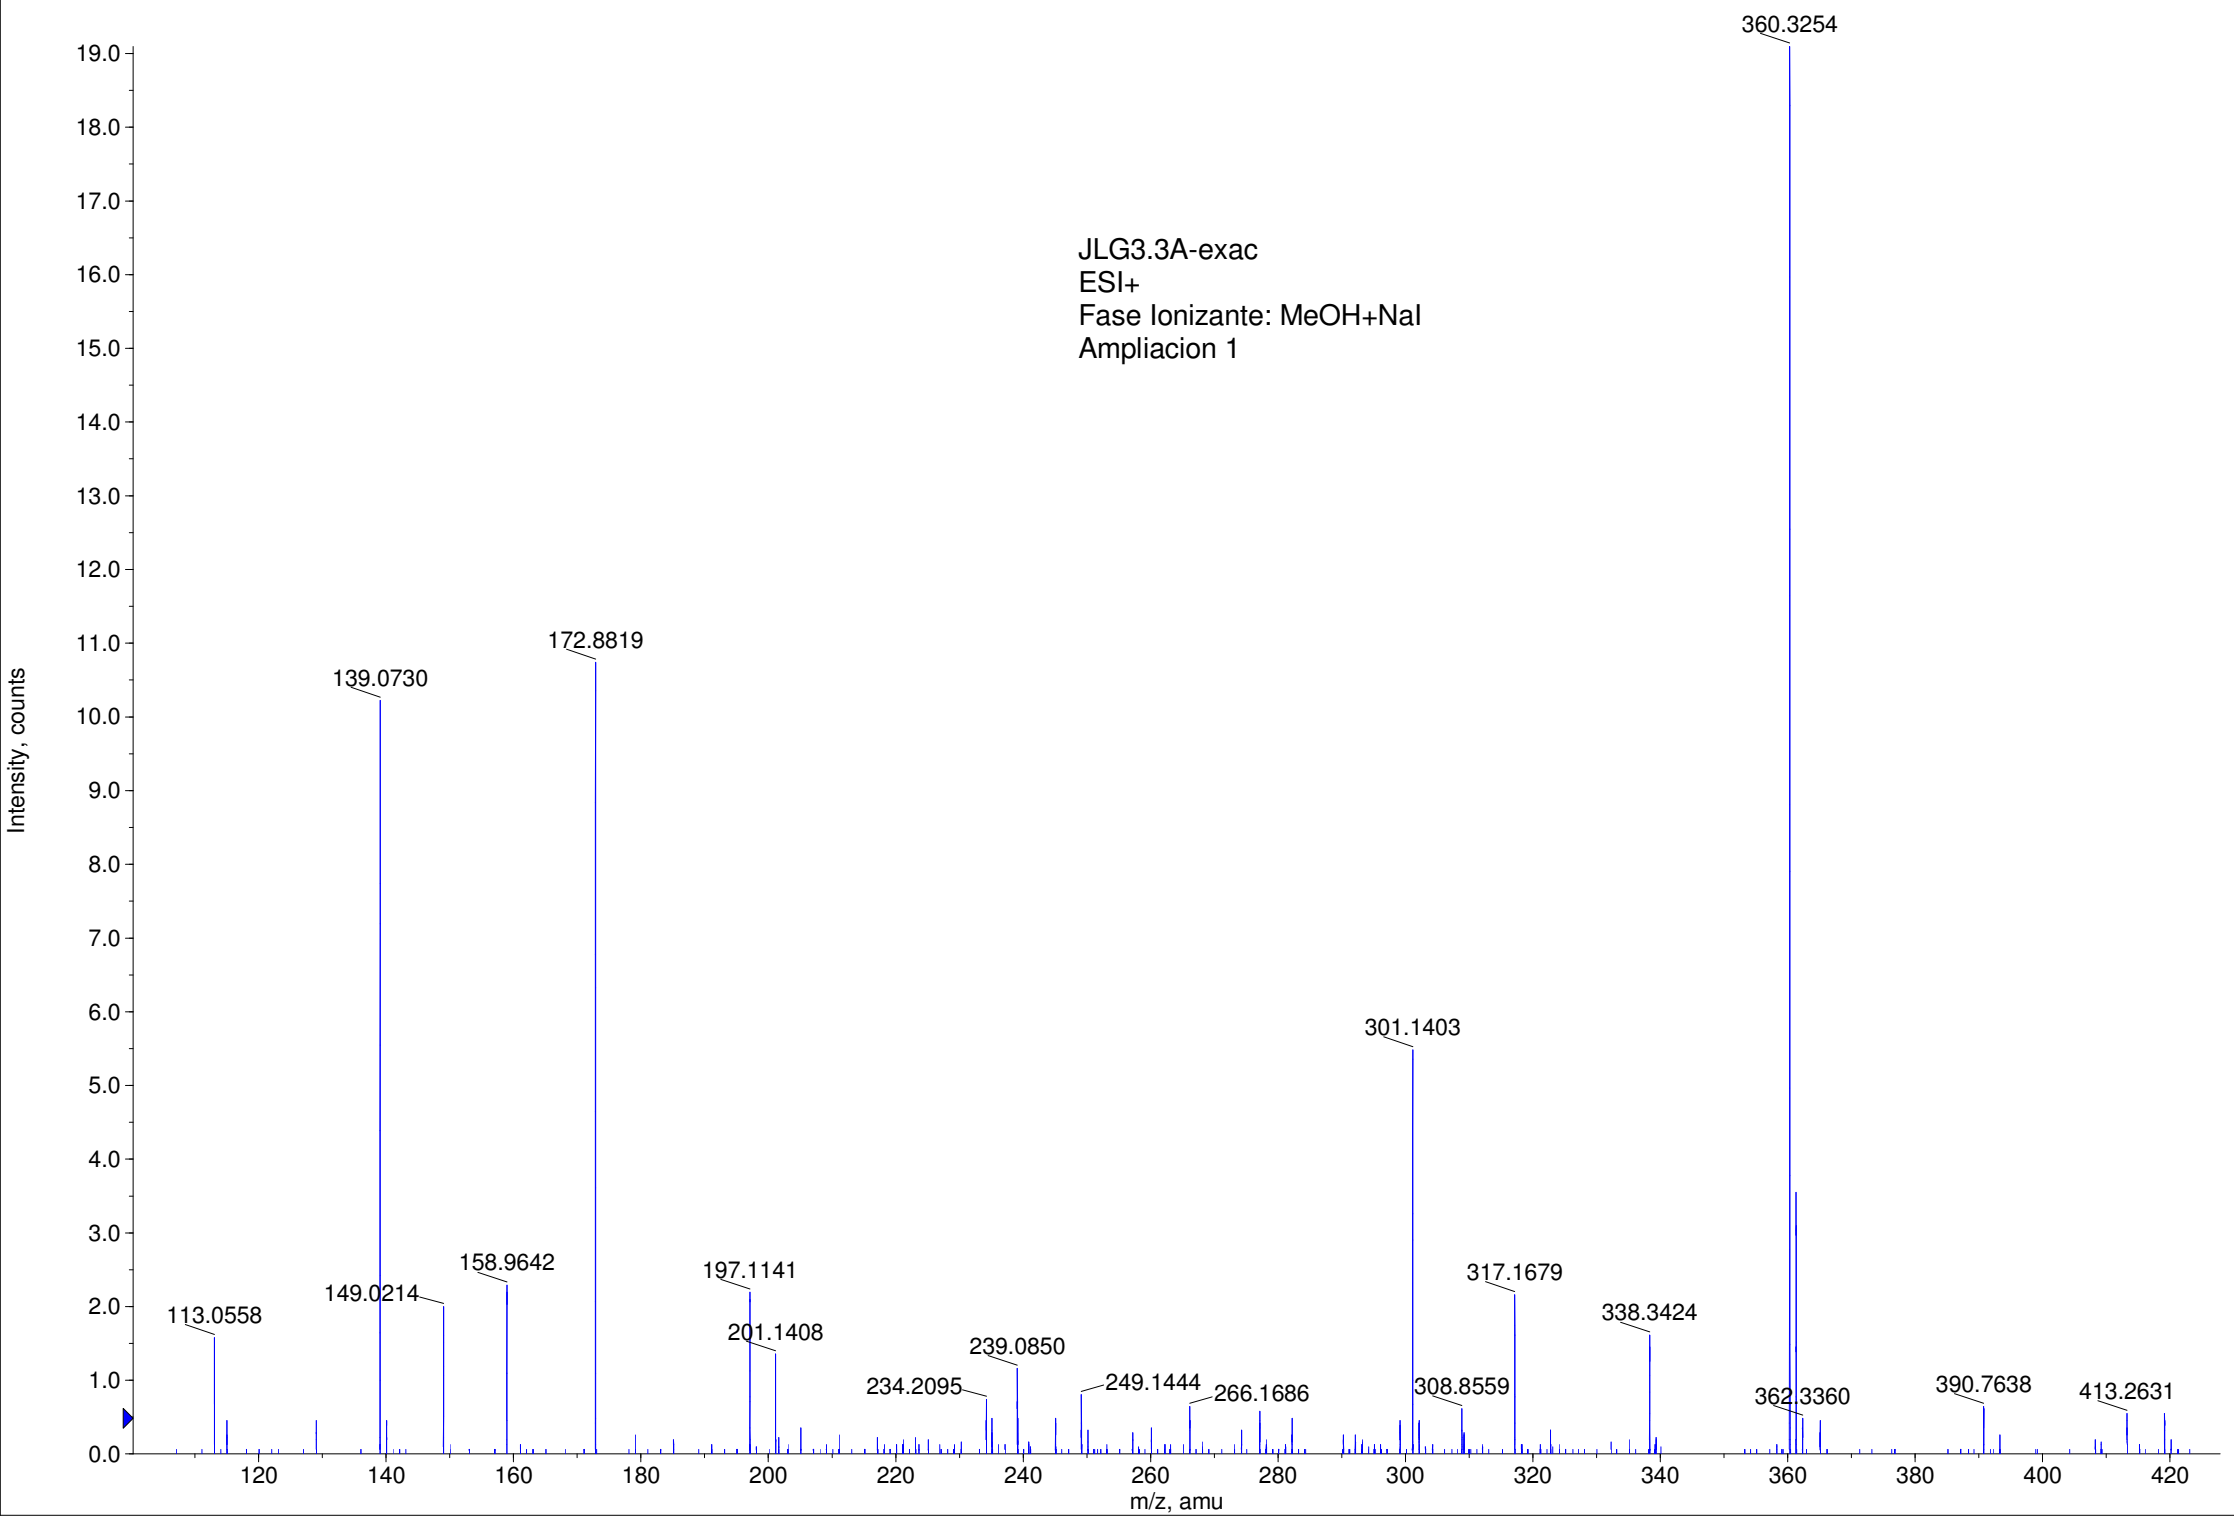

+TOF MS: 2.500 to 3.000 min from QS24569 (recalibrated).wiff  
a=3.57256565769336680e-004, t0=4.29482946002933800e+001 R;

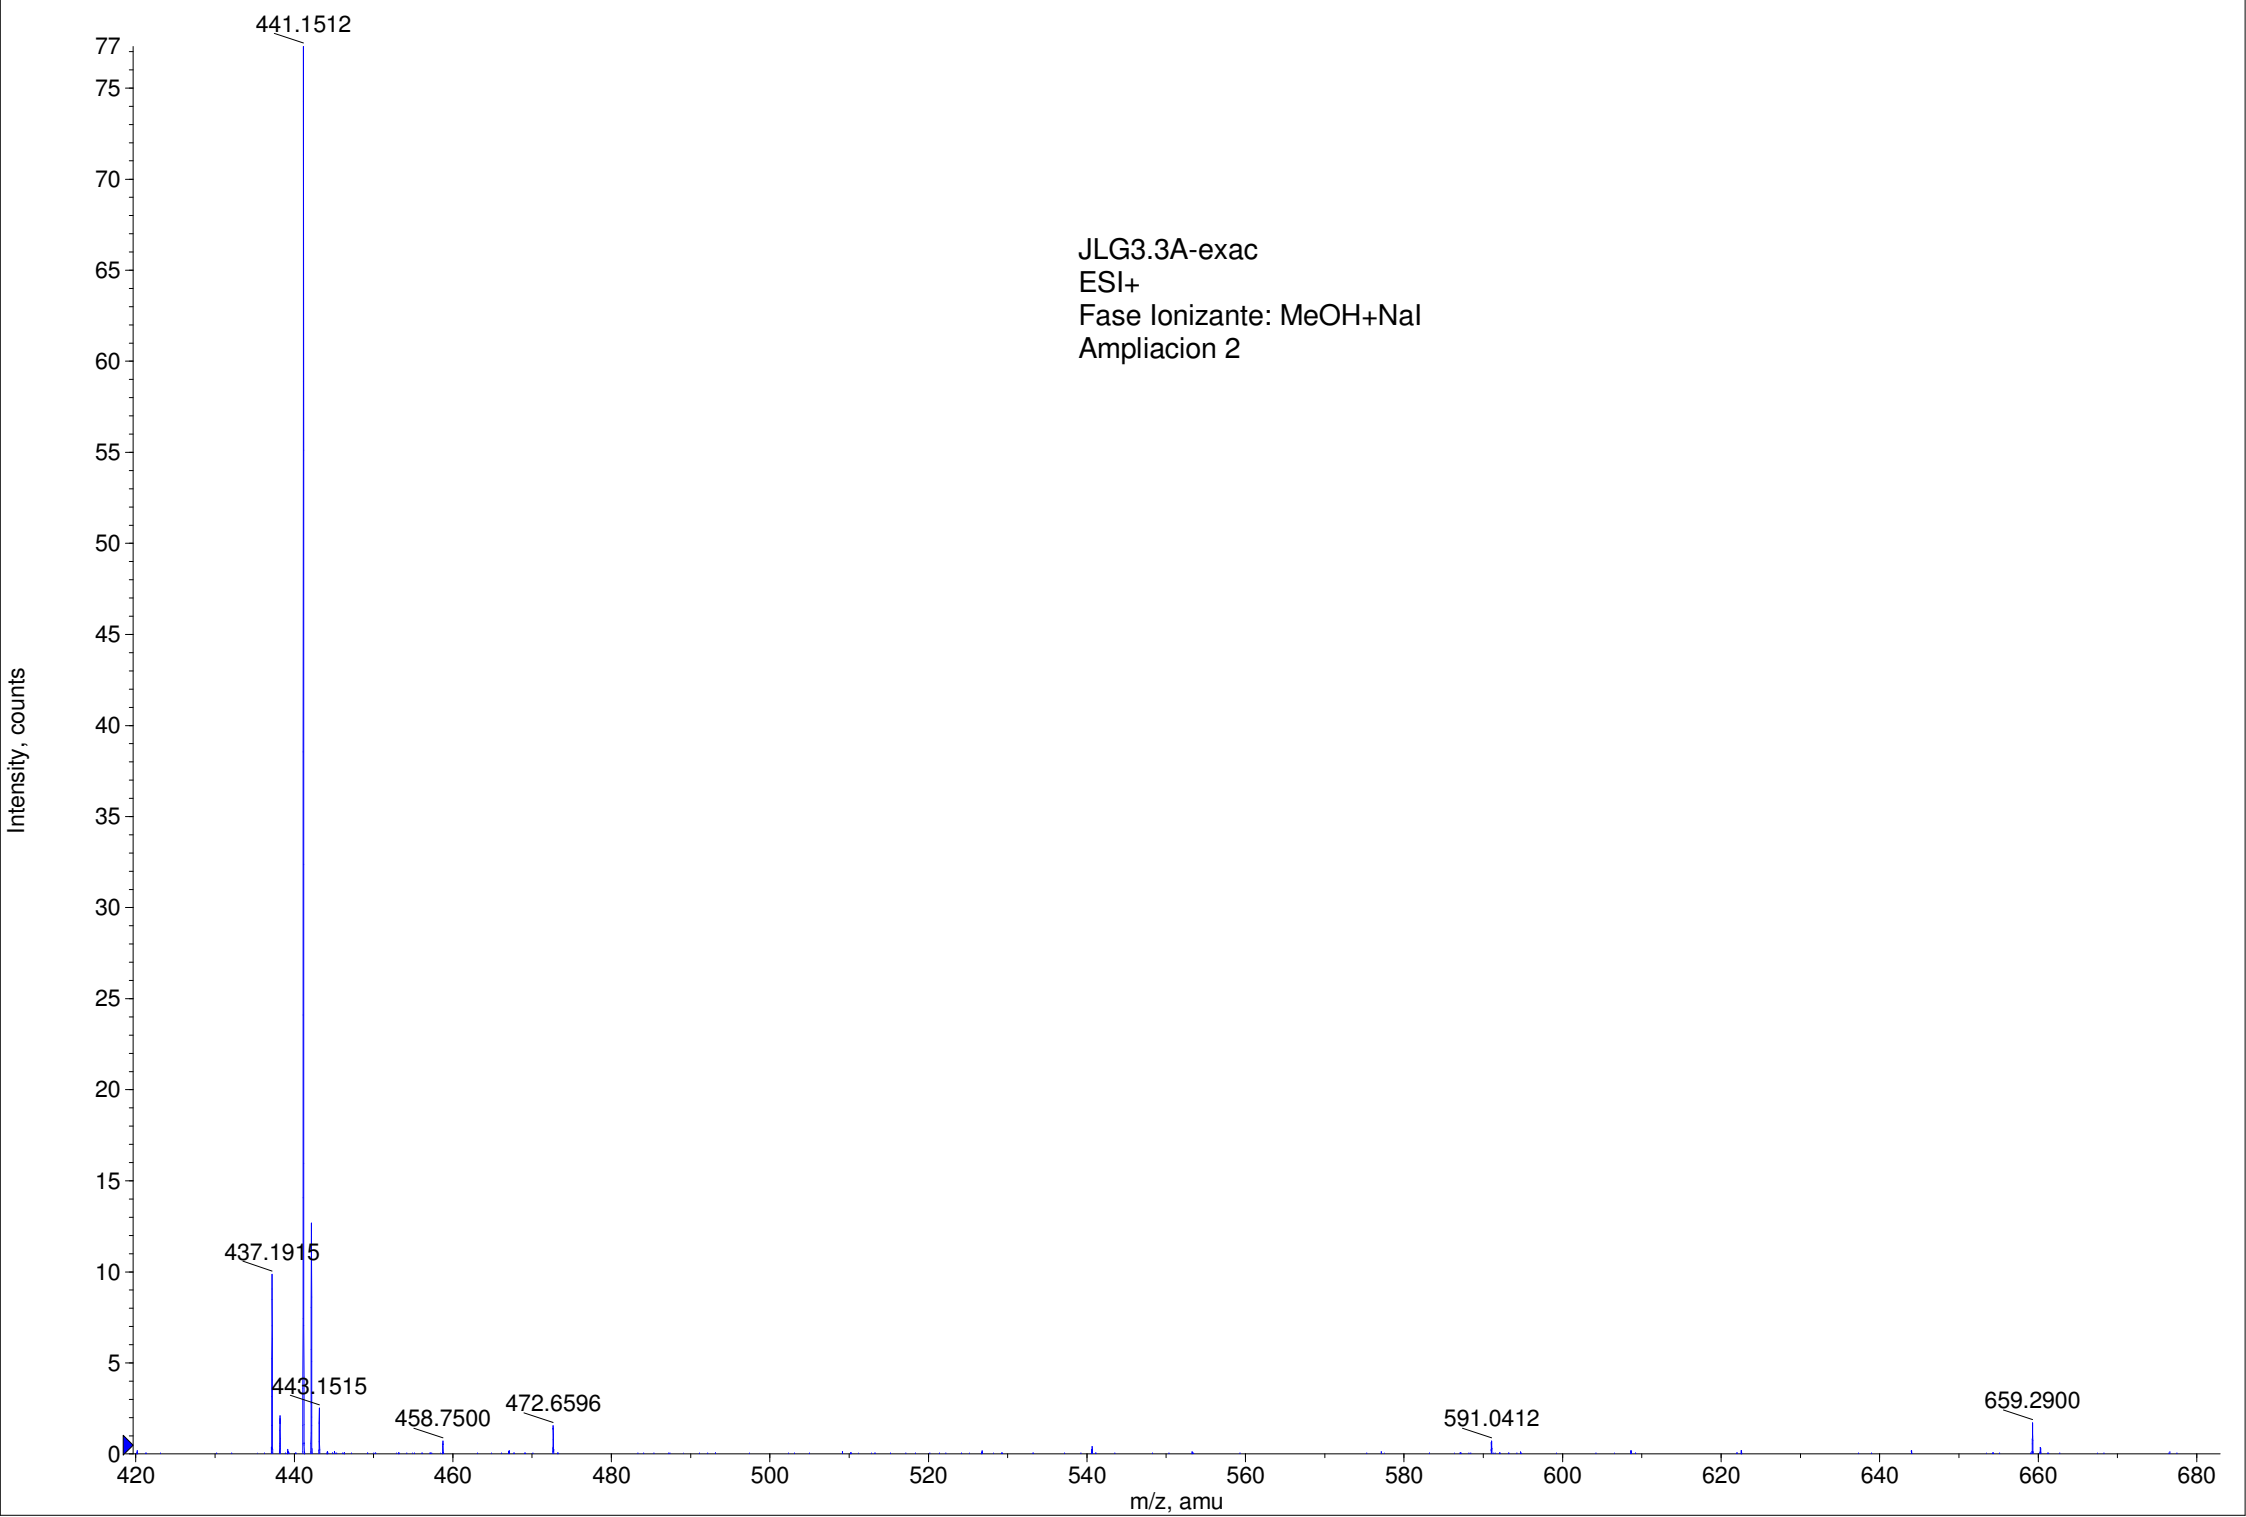

Peak List for "+TOF MS: 2.500 to 3.000 min from QS24569 (recalibrated).wiff□a=3.57256565769336680e-004, t0=4.29482946002933800e+001 R;"

|    | Centroid mass (amu) | Centroid intensity | Charges   | %Intensity |
|----|---------------------|--------------------|-----------|------------|
| 1  | 113.0558            | 1.8280             | Undefined | 2.0451     |
| 2  | 139.0730            | 12.1720            | Undefined | 13.2304    |
| 3  | 149.0214            | 2.5269             | Undefined | 2.5876     |
| 4  | 158.9642            | 2.7634             | Undefined | 2.9633     |
| 5  | 172.8819            | 16.4731            | Undefined | 13.8982    |
| 6  | 197.1141            | 2.6667             | Undefined | 2.8381     |
| 7  | 201.1408            | 1.3548             | Undefined | 1.7529     |
| 8  | 234.2095            | 0.6183             | Undefined | 0.9599     |
| 9  | 235.0948            | 0.3978             | Undefined | 0.6260     |
| 10 | 239.0850            | 1.3871             | Undefined | 1.5025     |
| 11 | 245.0788            | 0.6022             | Undefined | 0.6260     |
| 12 | 249.1444            | 0.7742             | Undefined | 1.0434     |
| 13 | 266.1686            | 0.6989             | Undefined | 0.8347     |
| 14 | 277.1427            | 0.7204             | Undefined | 0.7513     |
| 15 | 282.2085            | 0.4731             | Undefined | 0.6260     |
| 16 | 301.1403            | 8.4785             | Undefined | 7.0952     |
| 17 | 308.8559            | 0.5645             | Undefined | 0.7930     |
| 18 | 317.1679            | 2.9194             | Undefined | 2.7963     |
| 19 | 338.3424            | 2.3226             | Undefined | 2.0868     |
| 20 | 360.3254            | 30.5914            | 1         | 24.7078    |
| 21 | 361.3284            | 5.7634             | 1         | 4.5910     |
| 22 | 362.3360            | 0.5430             | Undefined | 0.6260     |
| 23 | 390.7638            | 1.0000             | Undefined | 0.8347     |
| 24 | 413.2631            | 0.6613             | Undefined | 0.7095     |
| 25 | 419.1647            | 0.8172             | Undefined | 0.7095     |
| 26 | 437.1915            | 17.1398            | 1         | 12.7713    |
| 27 | 438.1961            | 3.3978             | 1         | 2.7129     |
| 28 | 441.1512            | 140.1828           | 1         | 100.0000   |
| 29 | 442.1517            | 26.4516            | 1         | 16.4023    |
| 30 | 443.1515            | 3.3978             | 1         | 3.2554     |
| 31 | 458.7500            | 1.0161             | Undefined | 0.9182     |
| 32 | 472.6596            | 2.2366             | Undefined | 2.0033     |
| 33 | 591.0412            | 1.1183             | Undefined | 0.9182     |
| 34 | 659.2900            | 2.2688             | Undefined | 2.2120     |

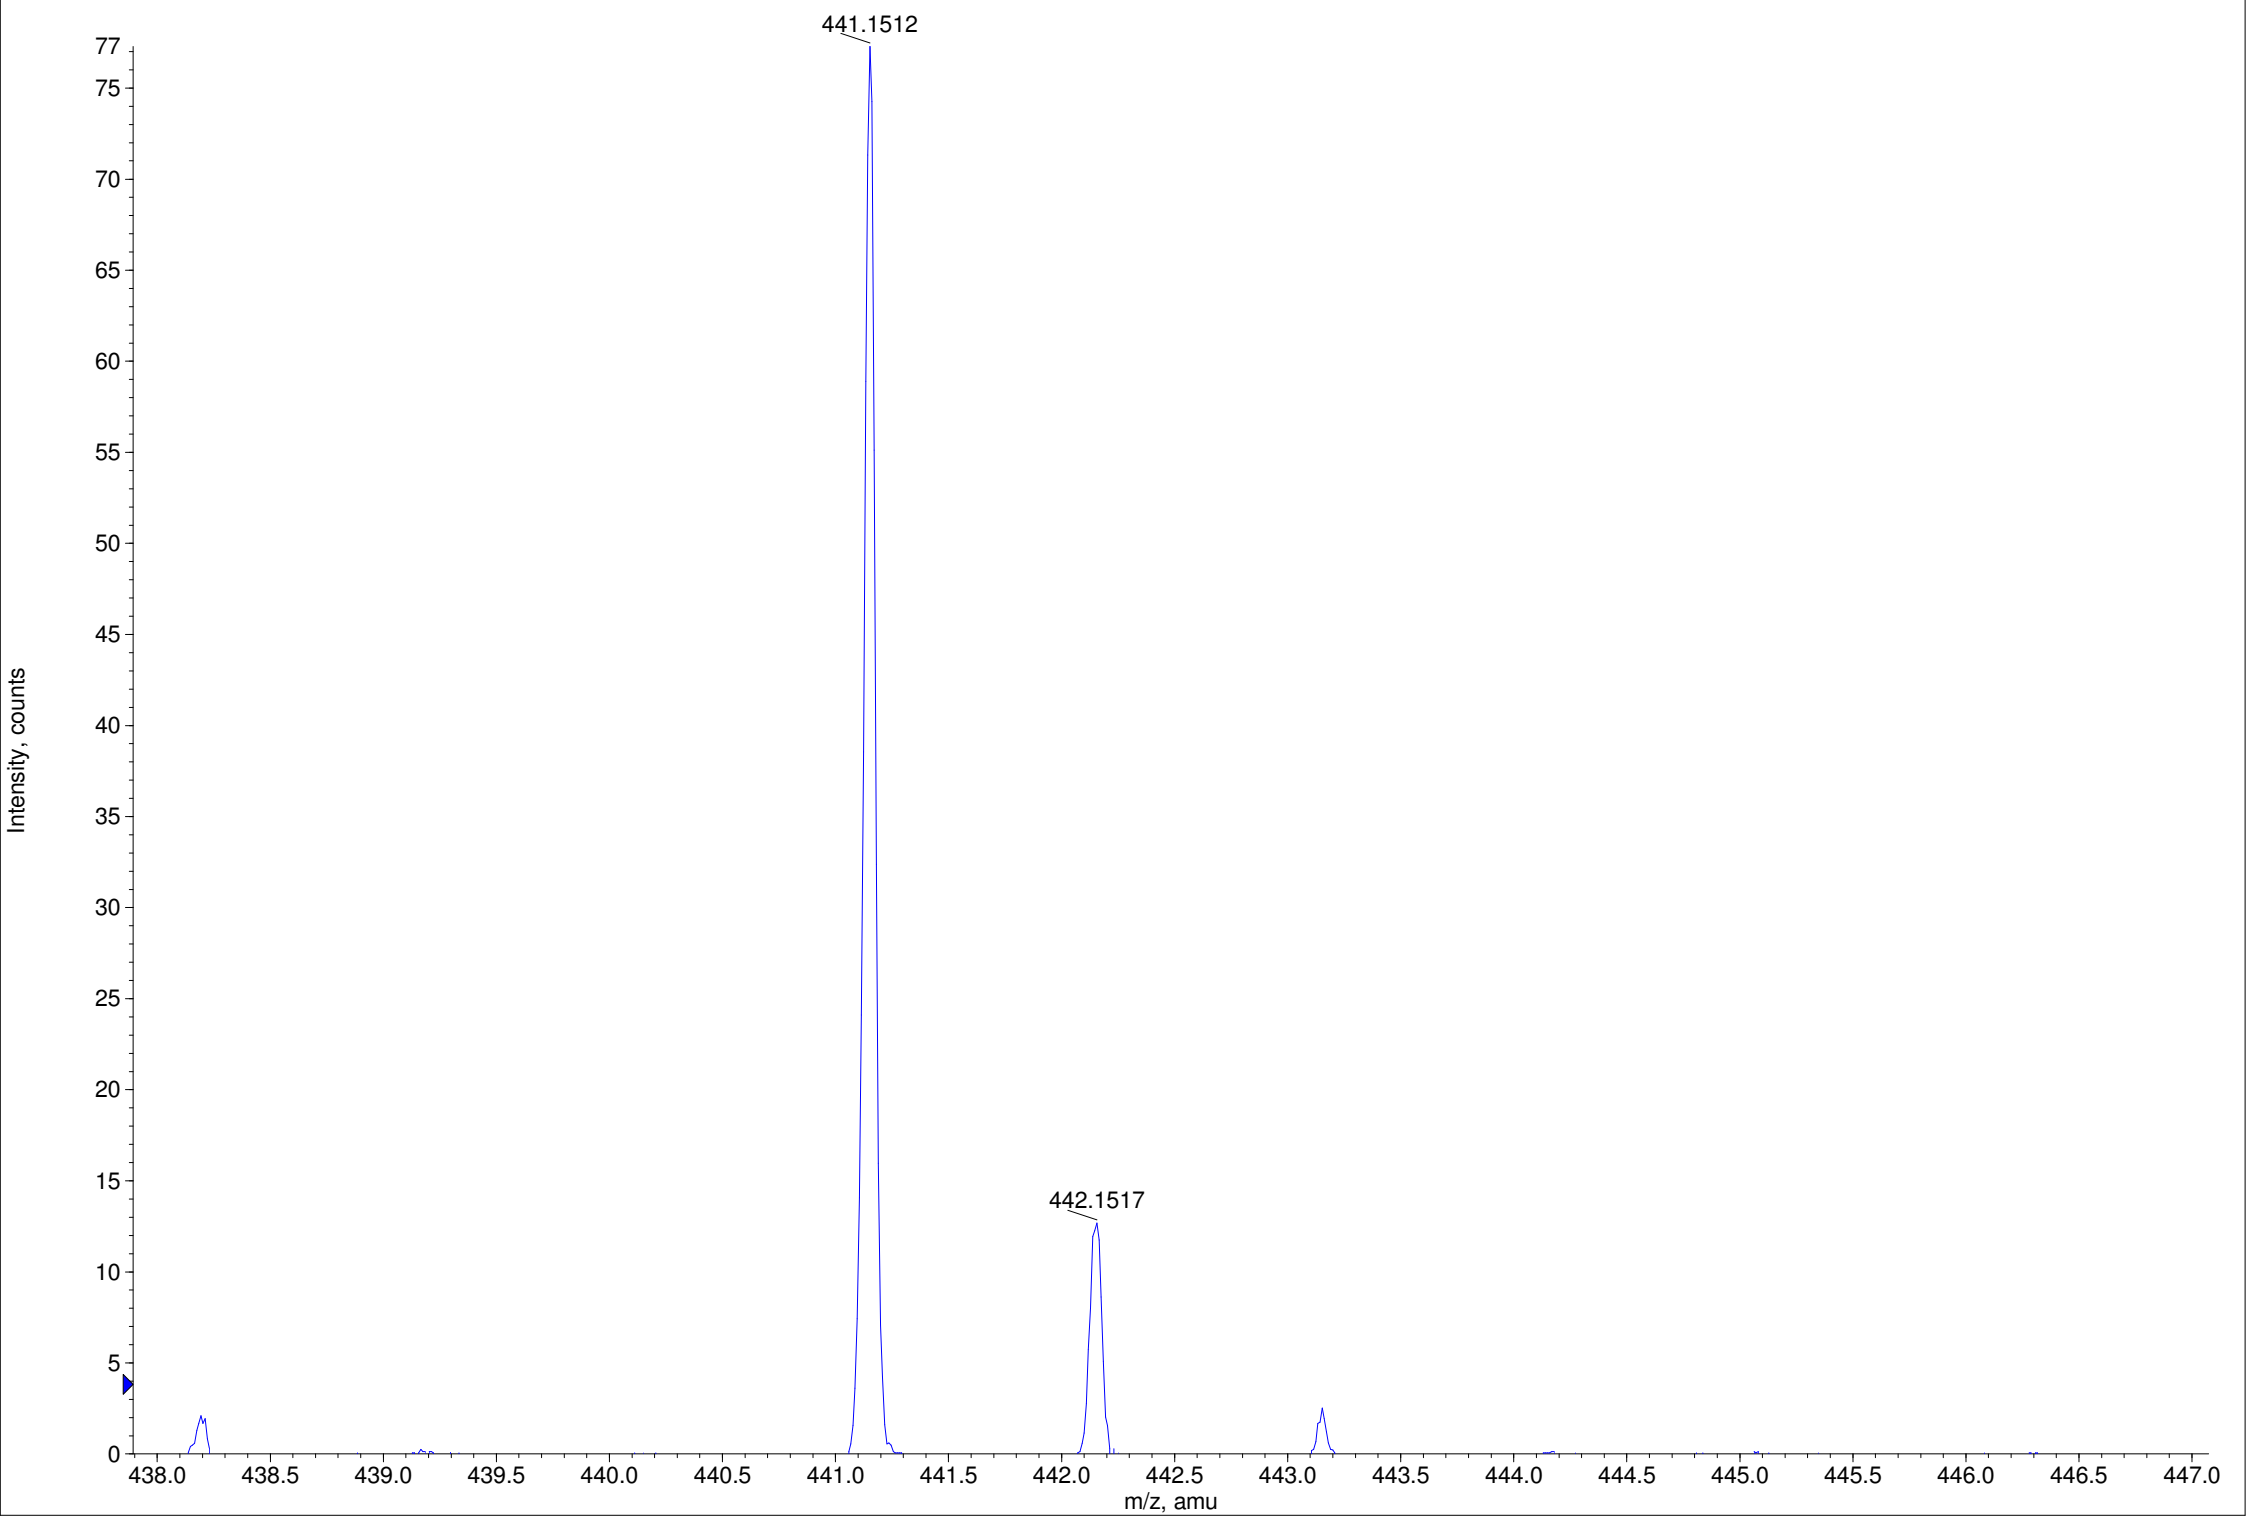



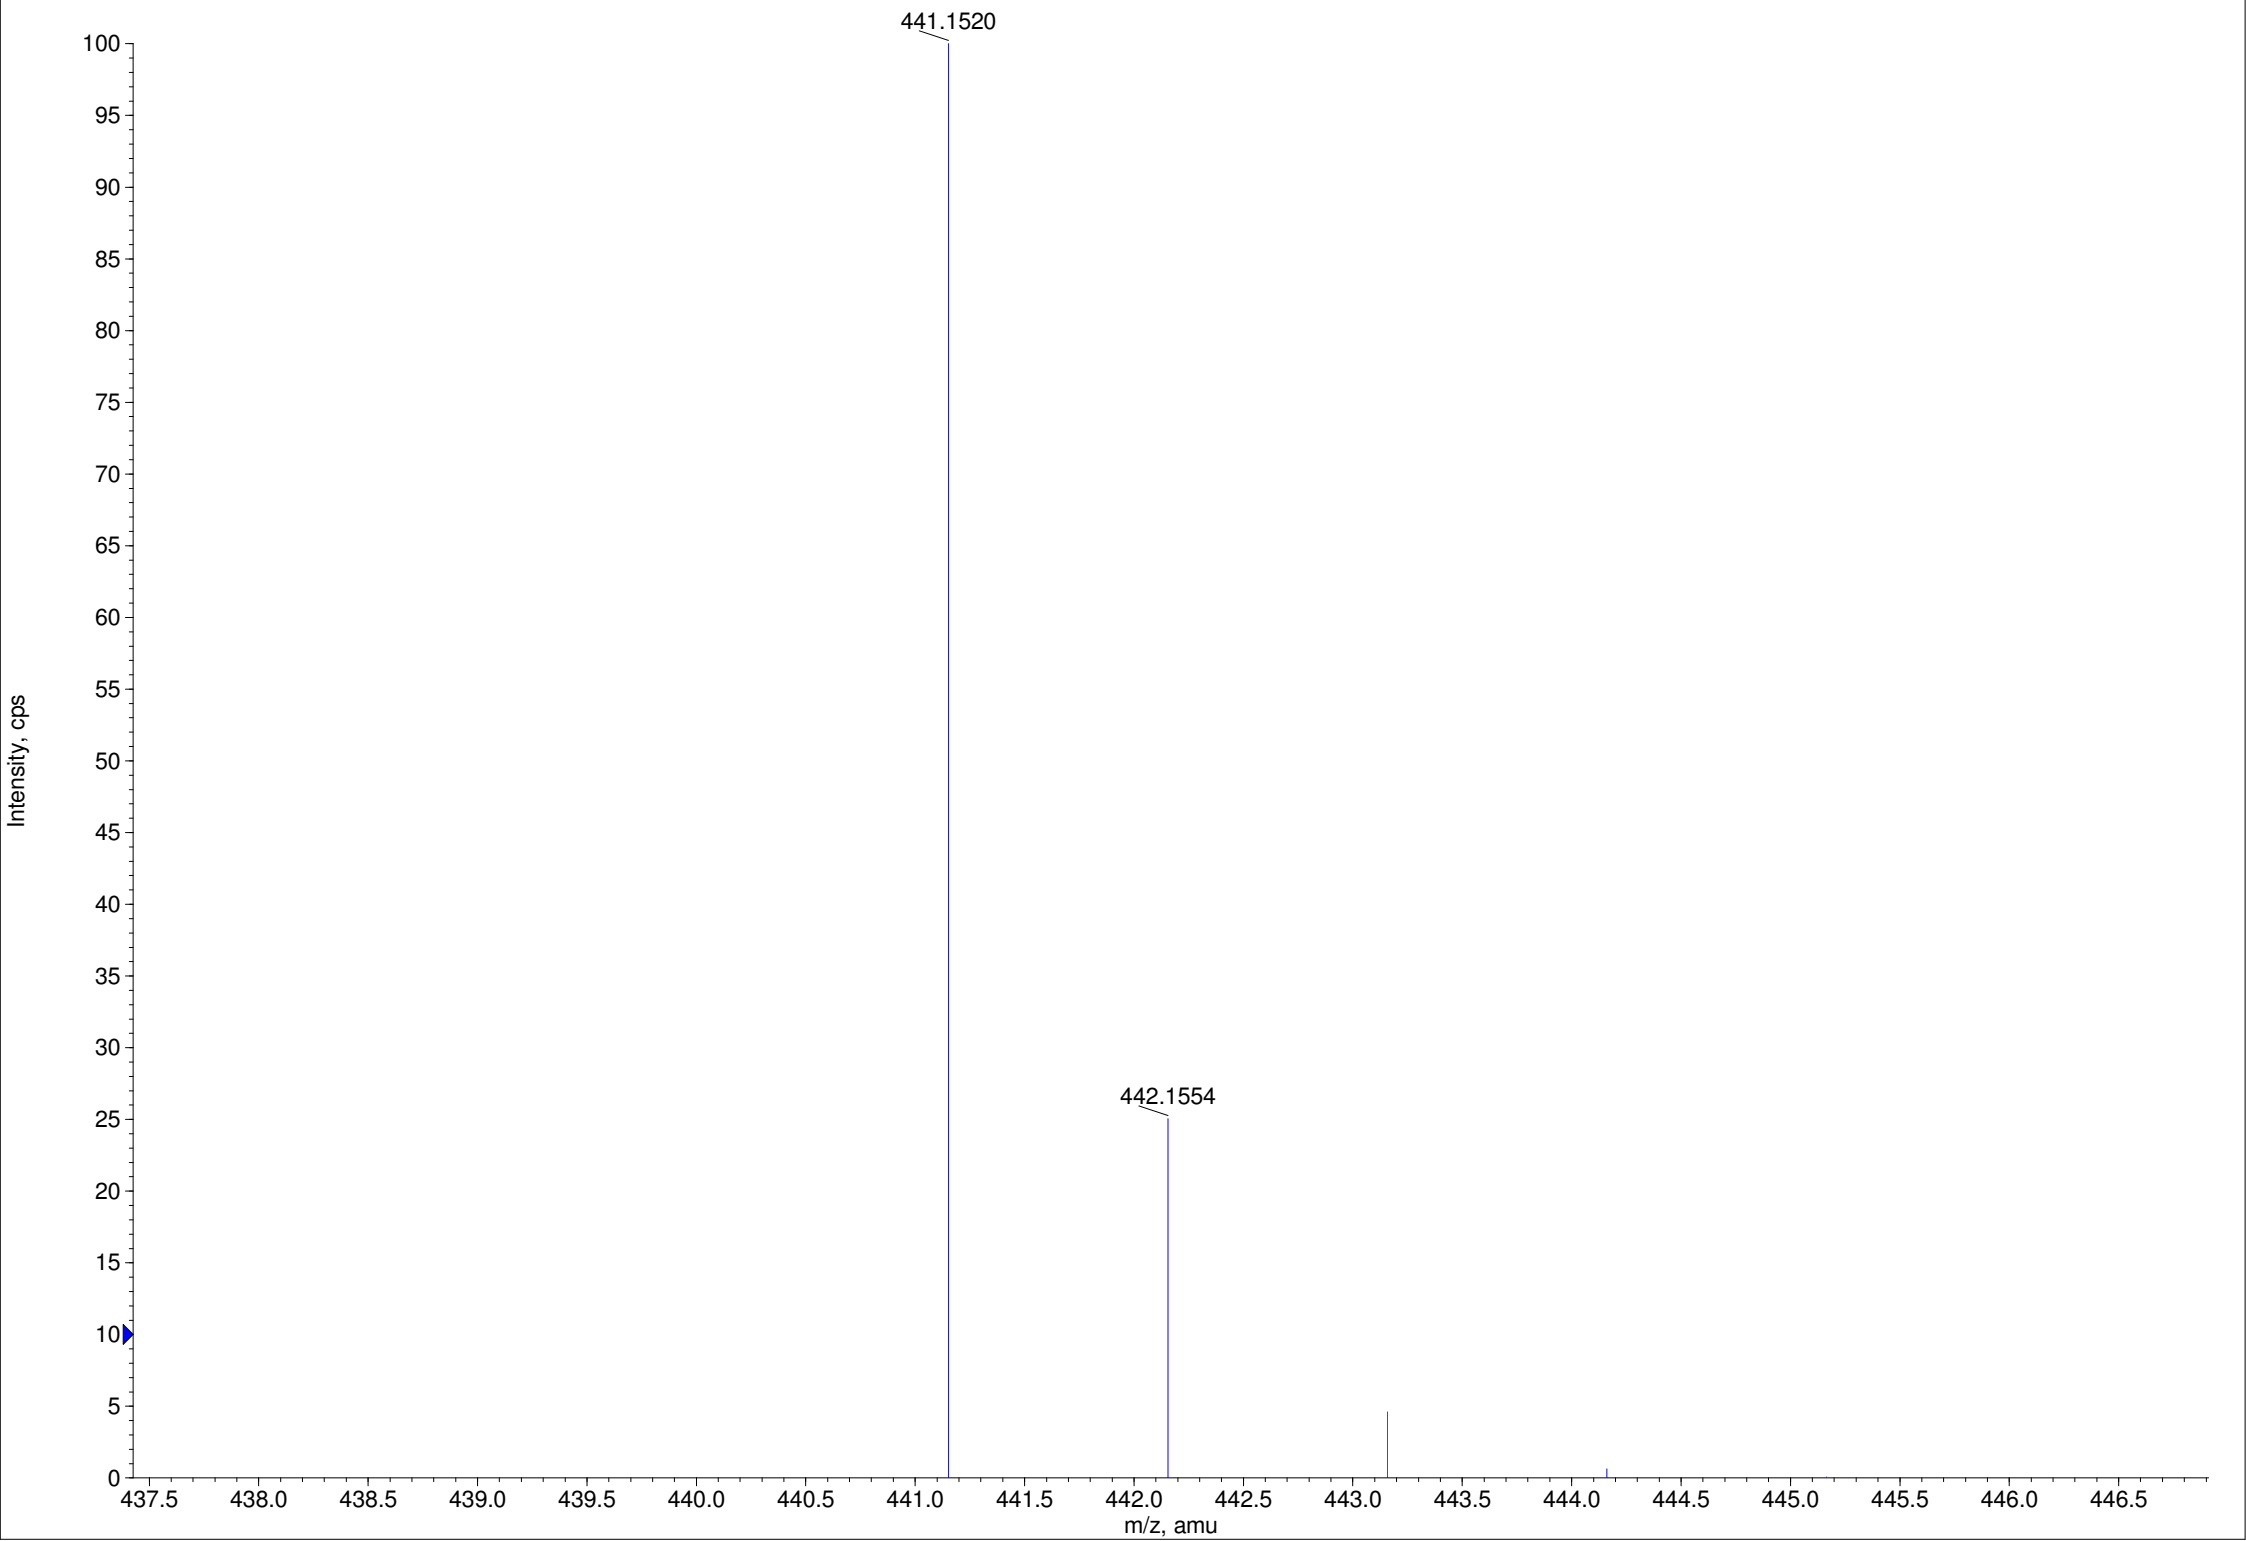

# Elemental composition calculator

Target m/z: +441.1512 amu  
 Tolerance: +10.0000 ppm  
 Result type: Elemental  
 Max num of results: 20  
 Min DBE: -2.0000 Max DBE: +100.0000  
 Electron state: Even  
 Num of charges: 1  
 Add water: N/A  
 Add proton: N/A

|   | Elements | Min Number | Max Number |
|---|----------|------------|------------|
| 1 | C        | 0          | 100        |
| 2 | H        | 0          | 100        |
| 3 | O        | 0          | 10         |
| 4 | Na       | 1          | 1          |

|   | Formula       | Calculated m/z (amu) | mDa Error | PPM Error | DBE |
|---|---------------|----------------------|-----------|-----------|-----|
| 1 | C22 H26 O8 Na | 441.1519             | -0.7892   | -1.7891   | 9.5 |
